# Supplementary material for: Synthesis of anisotropic silica colloids
Source: Royal Society of Chemistry journal article supplement (doi:10.1039/c7ra02835k), 2017-01-01
Supplement: c7ra02835k1.pdf [file c7ra02835k1.pdf]

**Electronic Supplementary Information**

# **Synthesis of Anisotropic Silica Colloids**

*Qiyu Yu,<sup>\*,a</sup> Kun Wang,<sup>b</sup> Jing Zhang,<sup>b</sup> Mingyang Liu,<sup>b</sup> Yuanyuan Liu,<sup>b</sup> Chao Cheng<sup>\*,c</sup>*

<sup>a</sup>School of Materials Science and Engineering, Sichuan University of Science and Engineering,  
Zigong 643000, China

<sup>b</sup>Institute of Atomic and Molecular Physics, Sichuan University, Chengdu 610064, China

<sup>c</sup>Modern Experiment Technology Center, Anhui University, Hefei 230601, China

Email: yuqiyu2008@163.com; chengc@ahu.edu.cn

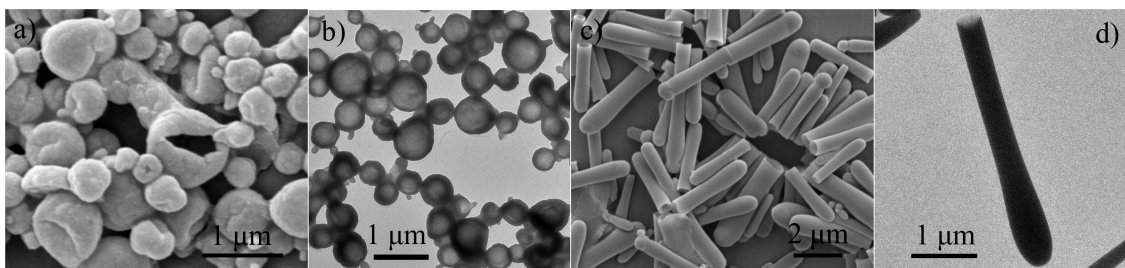

Fig. S1. Typical SEM and TEM images of the silica particles prepared with method II in (a, b) 2-propanol/ethanol ( $v/v = 10:1$ ) and (c, d) benzyl alcohol/ethanol ( $v/v = 10:1$ ).

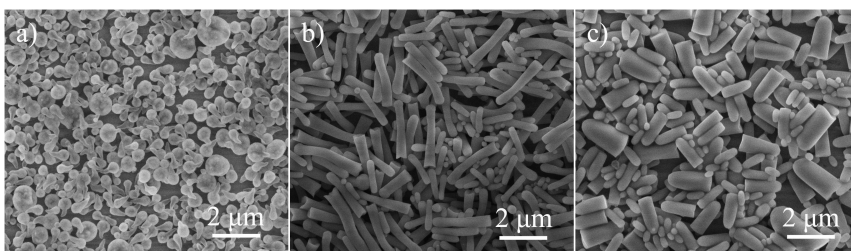

Fig. S2. Typical SEM images of the silica particles prepared with method I in three 1-hexanol/ethanol mixtures,  $v/v =$  a) 9:13, b) 1:1, and c) 7:4, respectively.

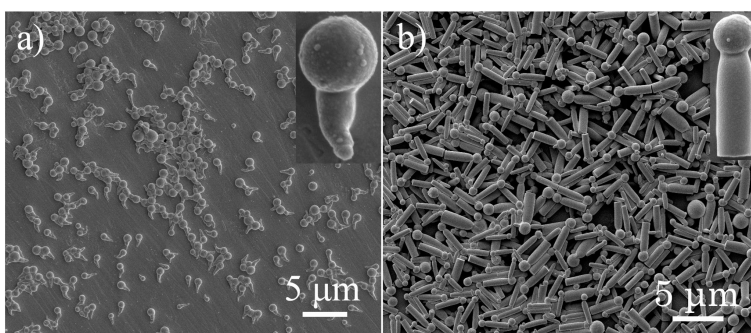

Fig. S3. Typical SEM images of the silica particles prepared with method II in two 1-hexanol/ethanol mixtures,  $v/v =$  a) 6:5 and b) 8:3, respectively.

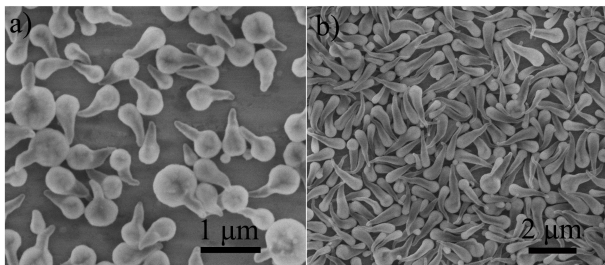

Fig. S4. Typical SEM images of the silica particles prepared with method I in 1-pentanol/ethanol mixtures, v/v = a) 5:6 and b) 6:5, respectively.

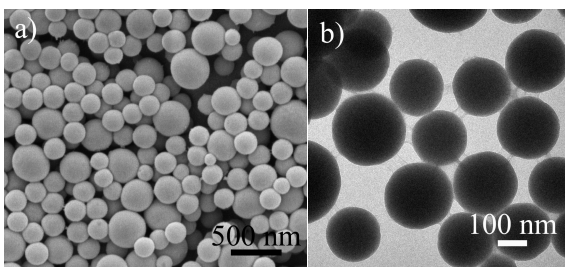

Fig. S5. Typical a) SEM and b) images of the silica particles prepared with method II in 1-octanol/ethanol (v/v =10:1) mixtures.

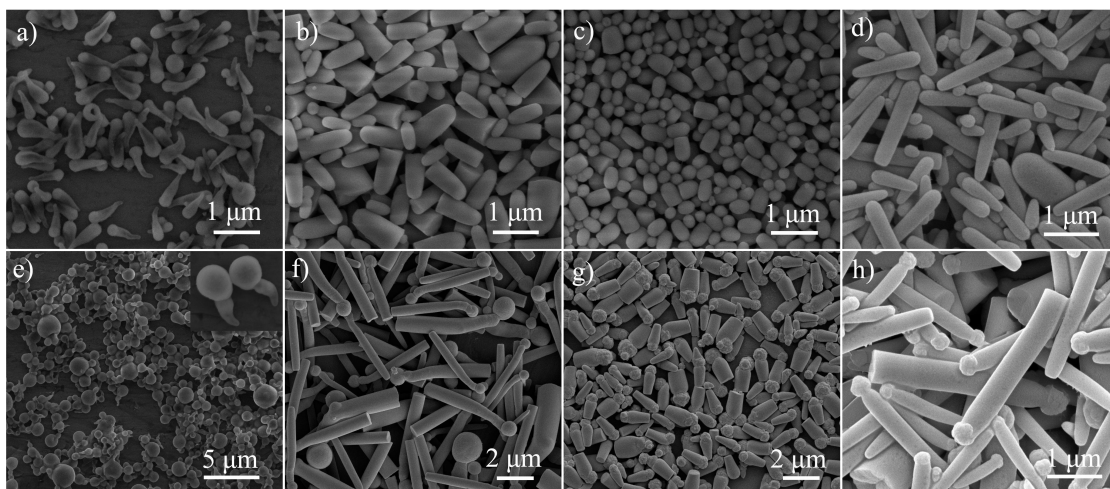

Fig. S6. Typical SEM images of anisotropic silica particles prepared with (a–d) method I and (e–h) method II in different alcohol solvent systems: a, e) 1-propanol; b, f) 1-butanol; c, g) 1-pentanol; d, h) 1-pentanol/ethanol (v/v = 10:1).

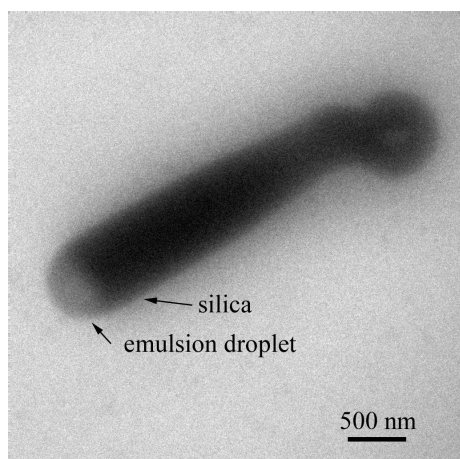

Fig. S7. The formation of a Janus-like silica–droplet structure. The sample was directly taken from the reaction medium (method II, in 1-butanol ) for TEM characterization.

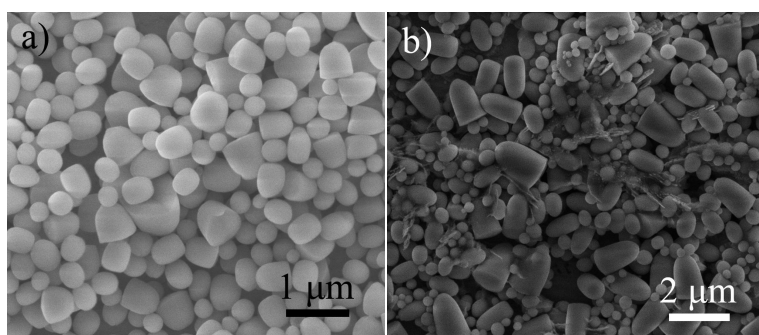

Fig. S8. Silica particles prepared in 1-pentanol/ethanol (v/v = 10:1) with method I by using (a) LD-tartaric acid or (b) citric acid instead of sodium citrate.

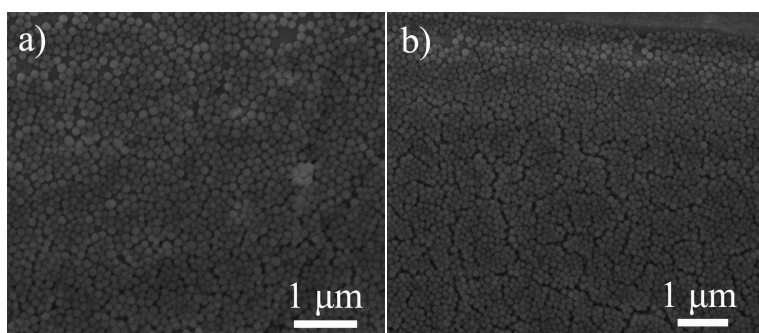

Fig. S9. Silica particles prepared in 1-pentanol/ethanol (v/v = 10:1) with method I by using (a) NH<sub>4</sub>Cl or (b) NH<sub>4</sub>NO<sub>3</sub> instead of sodium citrate.



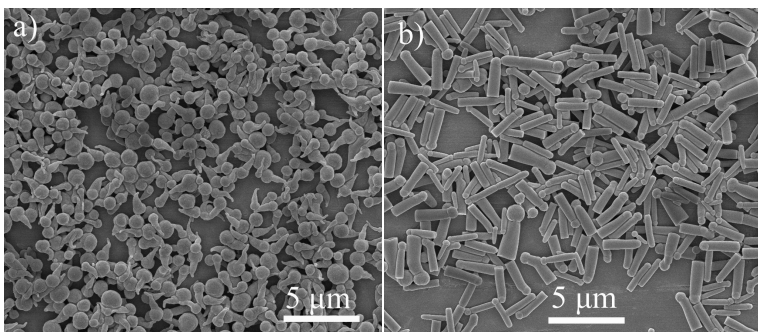

Fig. S10. Typical SEM images of the silica particles prepared with method II in two 1-hexanol/ethanol mixtures, v/v = a) 6:5 and b) 8:3, respectively. The synthesis adopted 55 mL alcohol solvent systems.

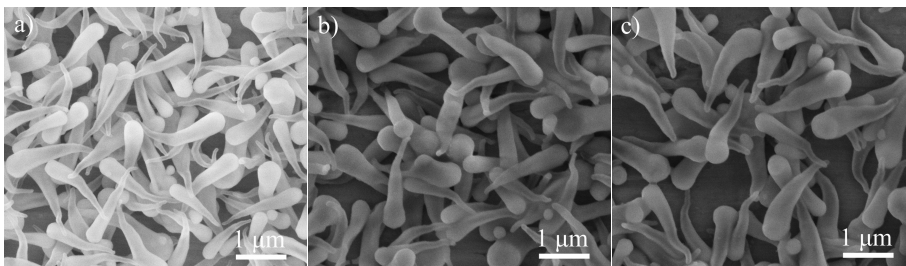

Fig. S11. Silica particles prepared with method I in 1-heptanol/ethanol (v/v = 5:6): a) obtained after a reaction time of 2 hours; b, c) obtained after further aging for 2 and 6 hours, respectively.

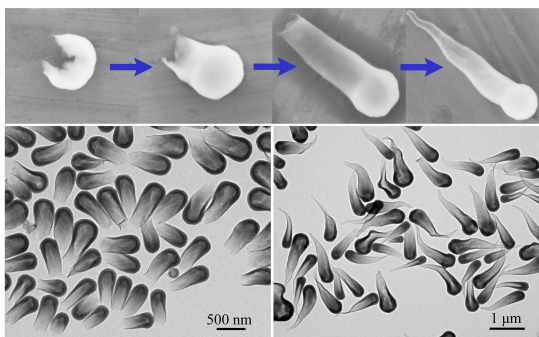

Graphic Abstract. The morphological evolution of the tadpole-like hollow silica particles, and corresponding TEM images of typical intermediate and final products.
